# Supplementary material for: Combined MTOR and autophagy inhibition: Phase I trial of hydroxychloroquine and temsirolimus in patients with advanced solid tumors and melanoma
Source: PubMed Central journal article supplement — Autophagy. 2014 May 20;10(8):1391–402. doi: 10.4161/auto.29119 (PMC4203516; doi:10.4161/auto.29119), 2014-05-20
Supplement: auto-10-1391-s01.pdf [file auto-10-1391-s01.pdf]

## **Supplemental Material to:**

**Reshma Rangwala, Claire Chang, Janice Hu,  
Kenneth Algazy, Tracey Evans, Leslie Fecher,  
Lynn Schuchter, Drew A Torigian, Jeffrey Panossian,  
Andrea Troxel, Kay-See Tan, Dan F Hetjian,  
Angela Demichele, David Vaughn, Maryann Redlinger,  
Abass Alavi, Jonathon Kaiser, Laura Pontiggia, Lisa E Davis,  
Peter J O'Dwyer, and Ravi K Amaravadi**

**Combined MTOR and autophagy inhibition:  
Phase I trial of hydroxychloroquine and temsirolimus in  
patients with advanced solid tumors and melanoma**

**Autophagy 2014; 10(8)**

**<http://dx.doi.org/10.4161/auto.29119>**

**[www.landesbioscience.com/journals/autophagy/article/29119](http://www.landesbioscience.com/journals/autophagy/article/29119)**

**Table S1. HCQ dose cohorts**

| <b>HCQ/mg day<br/>Dose Cohort</b> | <b>N</b> | <b>HCQ Schedule</b> |
|-----------------------------------|----------|---------------------|
| 200                               | 11       | 200 mg daily        |
| 400                               | 3        | 200 mg twice daily  |
| 800                               | 9        | 400 mg twice daily  |
| 1200                              | 15       | 600 mg twice daily  |

**Table S2. Melanoma patient characteristics**

|                                    |                       |
|------------------------------------|-----------------------|
| <b>Age , median (range)</b>        | 60 (51-80)            |
| <b>Gender, N (%)</b>               |                       |
| Male                               | 14 (74%)              |
| Female                             | 5 (26%)               |
| <b>ECOG PS, N (%)</b>              |                       |
| 0                                  | 13 (68%)              |
| 1                                  | 6 (32%)               |
| <b>Stage, N (%)</b>                |                       |
| M1a/M1b                            | 21%                   |
| M1c                                | 69%                   |
| <b>LDH, N (%)</b>                  |                       |
| LDH < ULN                          | 47%                   |
| LDH>ULN                            | 53%                   |
| <b>Brain mets, N (%)</b>           |                       |
|                                    | 5 (26%)               |
| <b>BRAF mutation status, N (%)</b> |                       |
| BRAF mutant                        | 16% (2 V600E, 1K601E) |
| BRAF WT                            | 84%                   |
| <b>Prior therapies</b>             |                       |
| Number, median (range)             | 1 (0-5)               |
| Prior ipilimumab, N (%)            | 2 (11%)               |
| Prior BRAF inhibitor, N (%)        | 2 (11%)               |

**Table S3. Dose escalation and dose limiting toxicities**

| <b>HCQ dose cohort (mg/day)</b> | <b>HCQ dosing</b> | <b>N</b> | <b>Dose-limiting toxicity (N)</b>         | <b>Other serious adverse events (N)</b>                            |
|---------------------------------|-------------------|----------|-------------------------------------------|--------------------------------------------------------------------|
| 200                             | 200 mg po qd      | 11       | Grade 4 thrombocytopenia and bleeding (1) | None                                                               |
| 400                             | 200 mg po bid     | 3        | None                                      | Grade 4 pulmonary tumor abscess                                    |
| 800                             | 400 mg po bid     | 9        | None                                      | Grade 5 pneumonia and sepsis (1)<br>Grade 3 perirectal abscess (1) |
| 1200                            | 600 mg po bid     | 15       | None                                      | Grade 3 anal fissure (1)                                           |

**Table S4. Evidence of progressive melanoma at study entry in HCQ 1200 mg/day patients**

| Patient* | Representative lesions  | Prior scan**,<br>cm | Baseline scan, cm | Evidence of progressive disease at study entry? |
|----------|-------------------------|---------------------|-------------------|-------------------------------------------------|
| 1        | Left adrenal mass       | absent              | 3.1               | Yes                                             |
|          | Right adrenal mass      | 0.5                 | 1.3               |                                                 |
| 2        | RML Lung                | 0.7                 | 1.2               | Yes                                             |
|          | RUL Lung                | 1.3                 | 2.1               |                                                 |
|          | Left inguinal LN        | 2.1                 | 2.9               |                                                 |
|          | cutaneous nodule        | 2                   | 2.8               |                                                 |
| 3        | Liver #1                | 2.1                 | 2.5               | Yes                                             |
|          | Liver #2                | 3                   | 3.3               |                                                 |
|          | Number of liver lesions |                     | increased         |                                                 |
| 4        | cutaneous nodule        | absent              | 1.7               | Yes                                             |
|          | Left hilar LN           | absent              | 1.5               |                                                 |
| 5        | Liver #1                | 0.7                 | 1.7               | Yes                                             |
|          | Number of liver lesions |                     | increased         |                                                 |
| 6        | LLL Lung #1             | 2                   | 3                 | Yes                                             |
|          | LLL Lung #2             | 3.6                 | 4.3               |                                                 |
|          | Number of lung lesions  |                     | increased         |                                                 |
|          | Liver #1                | 7.2                 | 9.6               |                                                 |
|          | Number of liver lesions |                     | increased         |                                                 |
| 7        | Left inguinal LN        | 6.5                 | 7.7               | Yes                                             |
|          | LUL lung #1             | 0.8                 | 1.5               |                                                 |
|          | LUL lung #2             | 0.8                 | 2.1               |                                                 |
|          | Left axillary LN        | 1.9                 | 2.8               |                                                 |
| 8        | gall bladder            | 5.9                 | 6.3               | Yes                                             |
|          | spleen #1               | 7.1                 | 7.4               |                                                 |
|          | spleen #2               | 3.5                 | 2.8               |                                                 |
| 9        | Number of liver lesions | 0                   | 5                 | Yes                                             |
| 10       | Number of lung lesions  | 6                   | 8                 | Yes                                             |
|          | RLL Lung #1             | 1                   | 2.5               |                                                 |
| 11       | Number of liver lesions | not specified       | 15                | Yes                                             |
|          | Right adrenal mass      | absent              | 1.5               |                                                 |
|          | pancreatic mass         | absent              | 2.2               |                                                 |
|          | portocaval LN           | absent              | 5                 |                                                 |
| 12       | RML Lung                | 0.9                 | 1.3               | Yes                                             |
|          | subcarinal LN           | 1.8                 | 2.8               |                                                 |
|          | Left axillary LN        | 1.7                 | 1.9               |                                                 |
|          | Left hilar LN           | absent              | 1.6               |                                                 |
|          | Spleen #1               | 3                   | 3.4               |                                                 |
|          | Spleen #2               | 2.8                 | 3.2               |                                                 |
|          | Left adrenal            | 5.6                 | 6.2               |                                                 |
|          | gastric mass            | 2                   | 3.1               |                                                 |
| 13       | Right axillary LN       | 2.6                 | 3.7               | Yes                                             |
|          | Left axillary LN        | 2.5                 | 3.3               |                                                 |

\* Patients with advanced melanoma treated with temsirolimus and 1200 mg/day of hydroxychloroquine.

\*\*CT or PET/CT scan obtained immediately prior to baseline scan (between 2 weeks and 6 months prior to baseline).

Abbreviations: RML, right middle lobe; RUL, right upper lobe; LN, lymph node; LLL, left lower lobe; LUL, left upper lobe

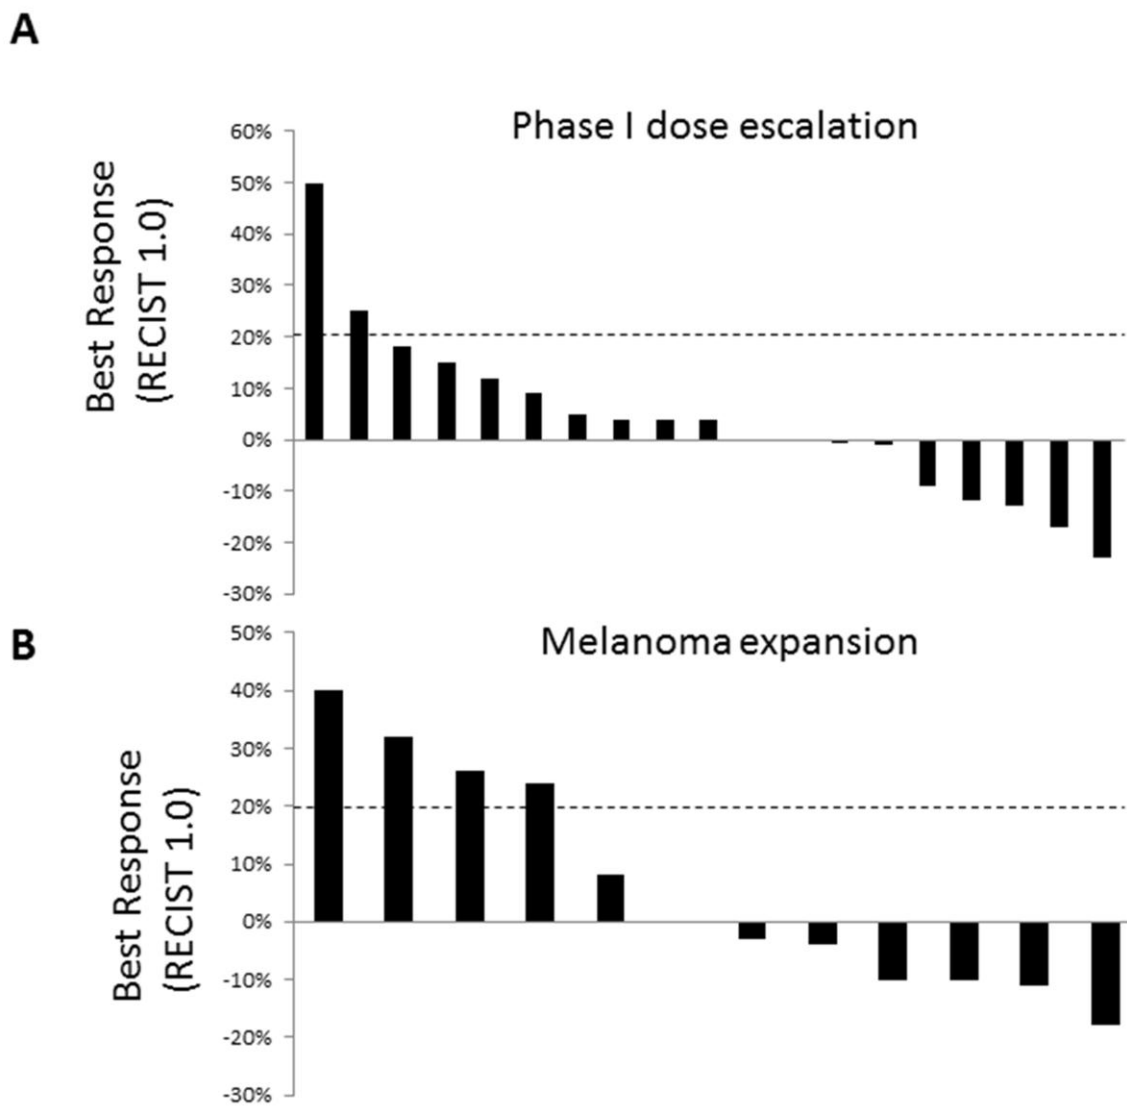

**Figure S1.** Waterfall plots of best response by sum of target lesions at nadir in patients treated with temsirolimus and hydroxychloroquine. Each bar represents an individual patient. **(A)** Dose escalation cohort. **(B)** Melanoma expansion cohort. Dotted line, threshold for progressive disease.

13 melanoma patients  
treated at HCQ 1200 mg/day

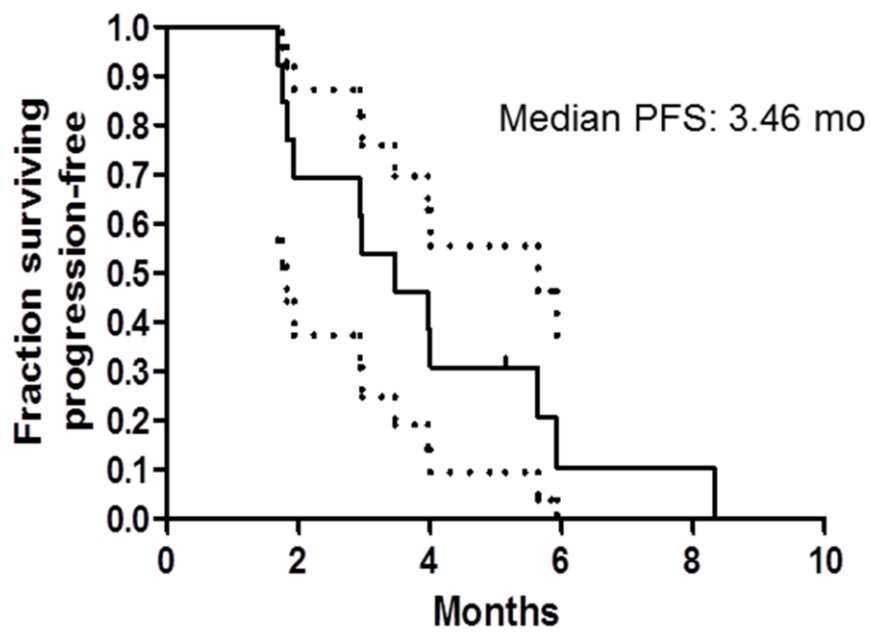

**Figure S2.** Kaplan Meier survival analysis of progression-free survival in 13 melanoma patients treated with temsirolimus and HCQ 1200 mg/day. Dotted lines, 95% confidence intervals.
